# Supplementary material for: The Cytomegalovirus Protein Kinase pUL97: Host Interactions, Regulatory Mechanisms and Antiviral Drug Targeting
Source: MDPI journal article supplement (doi:10.3390/microorganisms8040515), 2020-04-04
Supplement: s1 [file s1]

# Supplementary materials

*Review*

## **The cytomegalovirus protein kinase pUL97: host interactions, regulatory mechanisms and antiviral drug targeting**

**Mirjam Steingruber<sup>1</sup> and Manfred Marschall<sup>1,\*</sup>**

<sup>1</sup>Institute for Clinical and Molecular Virology, Friedrich-Alexander University of Erlangen-Nürnberg (FAU), Erlangen, Germany

\*Correspondence: [manfred.marschall@fau.de](mailto:manfred.marschall@fau.de); Tel.: +49-9131-85-26089

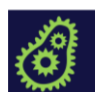**Table S1.** Viral proteins coimmunoprecipitated in complex with pUL97-Flag using lysates of HCMV-infected HFFs \*

| Gene                    | Description                                                     | IP: mAb/pAb-Flag |            |            |            |      |       |
|-------------------------|-----------------------------------------------------------------|------------------|------------|------------|------------|------|-------|
|                         |                                                                 | pUL97-Flag       |            |            |            |      | pUL97 |
|                         |                                                                 | I                | II         | III        | IV         | mean |       |
| <b>UL83<sup>1</sup></b> | <b>65 kDa phosphoprotein pp65</b>                               | <b>584</b>       | <b>611</b> | <b>403</b> | <b>458</b> | 514  | 13    |
| <b>UL97<sup>1</sup></b> | <b>Serine/threonine protein kinase UL97</b>                     | <b>141</b>       | <b>105</b> | <b>170</b> | <b>173</b> | 147  | -     |
| UL25                    | Phosphoprotein 85                                               | <b>98</b>        | <b>81</b>  | <b>67</b>  | <b>73</b>  | 80   | 3     |
| MCP                     | Major capsid protein                                            | <b>78</b>        | <b>37</b>  | <b>59</b>  | <b>65</b>  | 60   | 4     |
| RIR1                    | Ribonucleoside-diphosphate reductase large subunit-like protein | <b>58</b>        | <b>56</b>  | <b>45</b>  | <b>49</b>  | 52   | b.c.  |
| <b>UL44<sup>1</sup></b> | <b>DNA polymerase processivity subunit</b>                      | <b>59</b>        | <b>41</b>  | <b>44</b>  | <b>51</b>  | 49   | 5     |
| UL32                    | Large structural phosphoprotein                                 | <b>54</b>        | <b>23</b>  | <b>37</b>  | <b>47</b>  | 40   | -     |
| IRS1                    | Protein IRS1                                                    | <b>36</b>        | <b>26</b>  | <b>29</b>  | <b>24</b>  | 29   | b.c.  |
| UL48                    | Large tegument protein deneddylase                              | <b>23</b>        | <b>15</b>  | <b>35</b>  | <b>44</b>  | 29   | -     |
| UL47                    | Inner tegument protein                                          | <b>27</b>        | <b>13</b>  | <b>21</b>  | <b>29</b>  | 23   | -     |
| TRS1                    | Protein HHLF1                                                   | <b>24</b>        | <b>18</b>  | <b>21</b>  | <b>24</b>  | 22   | b.c.  |
| UL35                    | Protein UL35                                                    | <b>23</b>        | <b>24</b>  | <b>17</b>  | <b>14</b>  | 20   | -     |
| TRX2                    | Triplex capsid protein 2                                        | <b>21</b>        | <b>9</b>   | <b>15</b>  | <b>18</b>  | 16   | -     |
| <b>NEC2<sup>1</sup></b> | <b>Nuclear egress protein 2 pUL50</b>                           | <b>18</b>        | <b>13</b>  | <b>17</b>  | <b>13</b>  | 15   | b.c.  |
| UL26                    | Tegument protein UL26                                           | <b>13</b>        | <b>11</b>  | <b>17</b>  | <b>13</b>  | 14   | -     |
| UL112/UL113             | Early phosphoprotein p84                                        | <b>7</b>         | <b>9</b>   | <b>18</b>  | <b>17</b>  | 13   | -     |
| UL82                    | Protein pp71                                                    | <b>15</b>        | <b>4</b>   | <b>14</b>  | <b>13</b>  | 12   | -     |
| UL104                   | Portal protein                                                  | <b>14</b>        | <b>13</b>  | <b>9</b>   | <b>8</b>   | 11   | -     |
| DBP                     | Major DNA-binding protein                                       | <b>24</b>        | <b>5</b>   | <b>5</b>   | <b>8</b>   | 11   | -     |
| UL84                    | Protein UL84                                                    | <b>8</b>         | <b>5</b>   | <b>10</b>  | <b>14</b>  | 9    | -     |
| UL43                    | Tegument protein UL43                                           | <b>14</b>        | <b>5</b>   | <b>3</b>   | <b>8</b>   | 8    | -     |
| TRX1                    | Triplex capsid protein 1                                        | <b>12</b>        | <b>3</b>   | <b>6</b>   | <b>7</b>   | 7    | -     |
| CVC1                    | Capsid vertex component 1                                       | <b>8</b>         | <b>7</b>   | <b>6</b>   | <b>6</b>   | 7    | -     |
| <b>NEC1<sup>1</sup></b> | <b>Nuclear egress protein 1 pUL53</b>                           | <b>7</b>         | <b>5</b>   | <b>8</b>   | <b>5</b>   | 6    | b.c.  |
| UL29                    | Protein UL29/UL28                                               | <b>5</b>         | <b>5</b>   | b.c.       | <b>4</b>   | 5    | -     |
| US22                    | Early nuclear protein HWLF1                                     | <b>8</b>         | <b>9</b>   | b.c.       | <b>5</b>   | 7    | b.c.  |
| <b>UL69<sup>1</sup></b> | <b>mRNA export factor ICP27 homolog</b>                         | <b>52</b>        | <b>37</b>  | <b>24</b>  | <b>27</b>  | 35   | 8     |
| IR11                    | Viral Fc-gamma receptor-like protein IR11                       | <b>15</b>        | <b>9</b>   | <b>9</b>   | <b>6</b>   | 10   | b.c.  |
| UL98                    | Alkaline nuclease                                               | <b>4</b>         | <b>3</b>   | <b>7</b>   | <b>6</b>   | 5    | -     |
| UL54                    | DNA polymerase catalytic subunit                                | <b>3</b>         | -          | <b>10</b>  | <b>4</b>   | 6    | -     |
| UL103                   | Cytoplasmic envelopment protein 1                               | <b>4</b>         | b.c.       | b.c.       | b.c.       | 4    | -     |
| UL24                    | Protein UL24                                                    | <b>4</b>         | b.c.       | <b>4</b>   | <b>4</b>   | 4    | -     |
| UL70                    | DNA primase                                                     | <b>3</b>         | b.c.       | b.c.       | -          | 3    | -     |
| UL122                   | Viral transcription factor IE2                                  | <b>4</b>         | b.c.       | <b>6</b>   | <b>5</b>   | 5    | -     |
| TRM3                    | Tripartite terminase subunit 3                                  | b.c.             | b.c.       | <b>4</b>   | <b>3</b>   | 4    | -     |
| UL94                    | Cytoplasmic envelopment protein 2                               | -                | b.c.       | <b>4</b>   | b.c.       | 4    | -     |
| US20                    | Membrane protein US20                                           | b.c.             | b.c.       | <b>3</b>   | b.c.       | 3    | -     |
| CVC2                    | Capsid vertex component 2                                       | b.c.             | -          | b.c.       | <b>3</b>   | 3    | -     |

\*HFFs were infected with HCMV AD169-UL97(Mx4)-Flag (expressing the large isoform M1 of pUL97 C-terminally tagged with Flag) and harvested 4 d p.i. for immunoprecipitation (IP) of protein complexes and their subsequent analysis by mass spectrometry. The four columns I-IV present the number of peptides identified in four replicates. Flag-specific monoclonal and polyclonal antibodies were used for IP as indicated. All WSC values were corrected against the negative control value obtained by IP with a rabbit Fc fragment. Flag-specific IP using lysates from HCMV AD169-infected cells expressing untagged pUL97 served as an additional negative control. For a description of the methods for the proteomic analysis, see previous reports on similar investigations [51, 77]. Cut-off criteria were chosen as follows: (i)  $\geq 20\%$  IP control and (ii)  $> 15$ -fold above Flag neg. control, in either of the two samples pUL97-Flag or pUL97. <sup>1</sup>Known interactors and/or phosphorylated substrates of pUL97 in bold letters; b.c., below cut-off (cut-off  $\geq 3$  WSC); WSC, weighted spectral counts.



**Table S2.** Cyclins, CDKs and additional cellular proteins in complex with pUL97-Flag using lysates of HCMV-infected HFFs: the selection of scored proteins was performed according to their previously published properties of putative pUL97 interaction \*

| Gene                     | Description                                          | IP: mAb/pAb-Flag |           |             |           |      |       |
|--------------------------|------------------------------------------------------|------------------|-----------|-------------|-----------|------|-------|
|                          |                                                      | pUL97-Flag       |           |             |           | mean | pUL97 |
|                          |                                                      | I                | II        | III         | IV        |      |       |
| LMNA <sup>3</sup>        | Prelamin-A/C                                         | <b>71</b>        | <b>58</b> | <b>22</b>   | <b>26</b> | 44   | 6     |
| <b>IF16<sup>1</sup></b>  | <b>Interferon gamma-inducible protein 16</b>         | <b>10</b>        | <b>10</b> | <b>9</b>    | <b>7</b>  | 9    | -     |
| CDC5L <sup>3</sup>       | Cell division cycle 5-like protein                   | <b>4</b>         | <b>4</b>  | <b>4</b>    | <b>5</b>  | 4    | -     |
| EMD <sup>2</sup>         | Emerin                                               | <b>28</b>        | <b>18</b> | <b>4</b>    | b.c.      | 17   | b.c.  |
| <b>LMNA<sup>1</sup></b>  | <b>Lamin A/C</b>                                     | <b>9</b>         | <b>5</b>  | <b>3</b>    | b.c.      | 6    | b.c.  |
| LRRFIP2 <sup>3</sup>     | Leucine-rich repeat flightless-interacting protein 2 | <b>6</b>         | <b>6</b>  | <b>b.c.</b> | -         | 6    | -     |
| RBL1 <sup>3</sup>        | Retinoblastoma-like protein 1                        | <b>6</b>         | <b>1</b>  | <b>10</b>   | <b>7</b>  | 6    | -     |
| LEMD3 <sup>3</sup>       | Inner nuclear membrane protein Man1                  | <b>3</b>         | -         | -           | -         | 3    | -     |
| <b>CDK1<sup>1</sup></b>  | <b>Cyclin-dependent kinase 1</b>                     | b.c.             | b.c.      | <b>15</b>   | <b>8</b>  | 11   | -     |
| <b>CCNT1<sup>1</sup></b> | <b>Cyclin T1</b>                                     | -                | b.c.      | <b>4</b>    | <b>3</b>  | 4    | -     |
| <b>RB1<sup>1</sup></b>   | <b>Retinoblastoma-associated protein</b>             | b.c.             | b.c.      | <b>3</b>    | b.c.      | 3    | -     |
| <b>CCNB1<sup>1</sup></b> | <b>Cyclin B1, G2/mitotic-specific cyclin</b>         | -                | -         | <b>4</b>    | <b>3</b>  | 4    | -     |
| <b>CDK9<sup>1</sup></b>  | <b>Cyclin-dependent kinase 9</b>                     | b.c.             | b.c.      | <b>3</b>    | b.c.      | 3    | -     |
| CDC20 <sup>3</sup>       | Cell division cycle protein 20 homolog               |                  | b.c.      | <b>4</b>    | <b>3</b>  | 4    | -     |
| PPIB <sup>3</sup>        | Peptidyl-prolyl cis-trans isomerase B                | b.c.             | b.c.      | b.c.        | <b>32</b> | 32   | b.c.  |
| FKBP3 <sup>3</sup>       | Peptidyl-prolyl cis-trans isomerase FKBP3            | -                | -         | -           | <b>8</b>  | 8    | -     |
| CDK5RAP2 <sup>3</sup>    | CDK5 regulatory subunit-associated protein 2         | -                | -         | b.c.        | <b>3</b>  | 3    | -     |

\*HFFs were infected with HCMV AD169-UL97(Mx4)-Flag (expressing the large isoform M1 of pUL97 C-terminally tagged with Flag) and harvested 4 d p.i. for IP of protein complexes and their subsequent analysis by mass spectrometry. The four columns I-IV present the number of peptides identified in four replicates. Flag-specific monoclonal and polyclonal antibodies were used for IP as indicated. All WSC values were corrected against the negative control value obtained by IP with a rabbit Fc fragment. Flag-specific IP using lysates from HCMV AD169-infected cells expressing untagged pUL97 served as an additional negative control. For a description of the methods for the proteomic analysis, see previous reports on similar investigations [51, 77]. Cut-off criteria were chosen as follows: (i)  $\geq 20\%$  IP control and (ii)  $> 15$ -fold above Flag neg. control, in either of the two samples pUL97-Flag or pUL97.

<sup>1</sup>Known interactors and/or phosphorylated substrates of pUL97 in bold letters; <sup>2</sup>known components of pUL97-associated complexes; <sup>3</sup>putatively associated proteins; b.c., below cut-off (cut-off  $\geq 3$  WSC); WSC, weighted spectral counts.

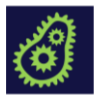**Table S3.** Quantities of pUL97 detected by cyclin-specific coimmunoprecipitation analysis (CoIP/Wb)\*

| Cyclin type | pUL97-Flag | pUL97<br>% IP | Flag neg. | pUL97-Flag | pUL97<br>x-fold Flag neg. | Flag neg. |
|-------------|------------|---------------|-----------|------------|---------------------------|-----------|
| Cyclin B1   | 20.7       | 1.3           | 0.8       | 27.3       | 1.7                       | 1.0       |
| Cyclin B2   | 16.3       | 40.5          | 0.6       | 28.6       | 71.0                      | 1.0       |
| Cyclin D1   | 8.9        | 11.2          | 4.9       | 1.8        | 2.3                       | 1.0       |
| Cyclin F    | 7.1        | 24.3          | 14.0      | 0.5        | 1.7                       | 1.0       |
| Cyclin K    | 20.9       | 23.7          | -1.5      | 20.9       | 23.7                      | 1.0       |
| Cyclin L2a  | 5.4        | 16.7          | 1.4       | 3.8        | 11.7                      | 1.0       |
| Cyclin Y    | 6.0        | 18.5          | -0.5      | 6.0        | 18.5                      | 1.0       |

\*Signal intensities of CoIP/WB experimentation (partly depicted by Figure S1) were quantitated densitometrically using Aida Image Analyzer v.4.23 (mean values of densitometrical dermination in quadruplicate, i.e. performing quantitation duplicates each of two independent Wbs). Direct pUL97-Flag IP via Flag-antibody was set to 100% and values corrected against the rabbit Fc fragment negative control by subtraction. Flag-specific IP using lysates from HCMV AD169-infected cells expressing untagged pUL97 (Flag neg.) served as an additional negative control. Cut-off criteria were chosen as follows: (i) IP % values >20% of IP control (positive, +) or value 15-20% of IP control (slightly positive, ±) and >15-fold above Flag neg. control, at least in one of the samples pUL97-Flag or pUL97.



**A**  
CoIP

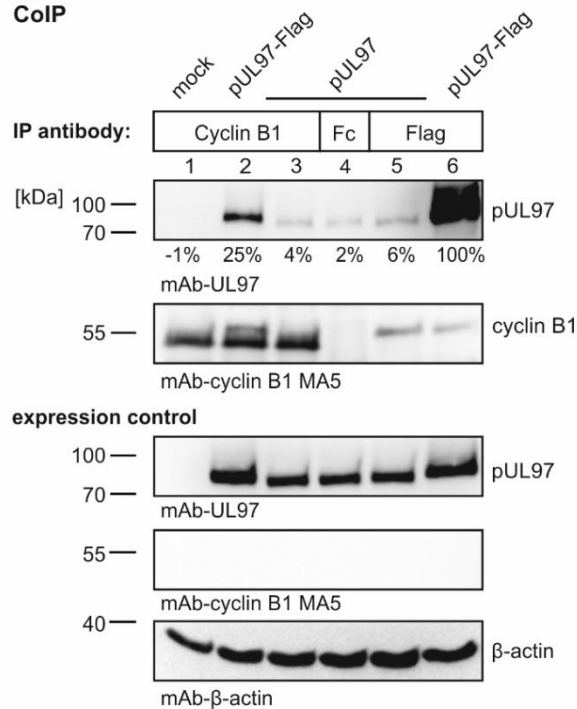

**B**  
CoIP

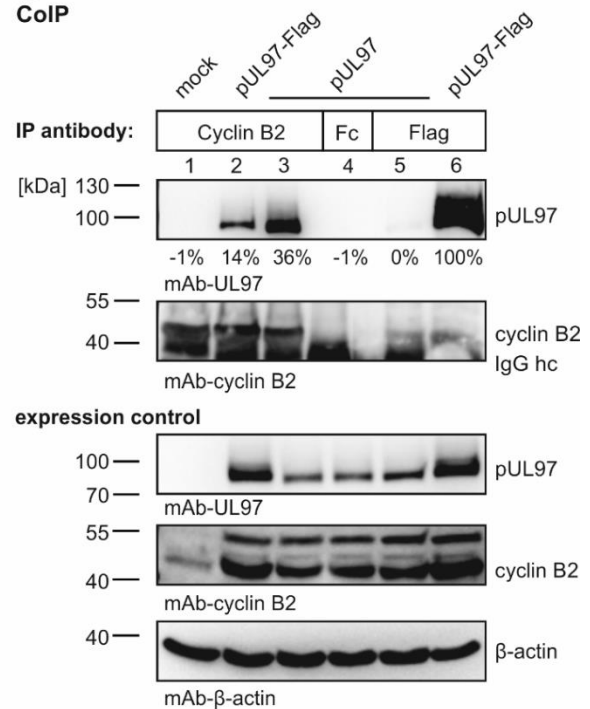

**C**  
CoIP

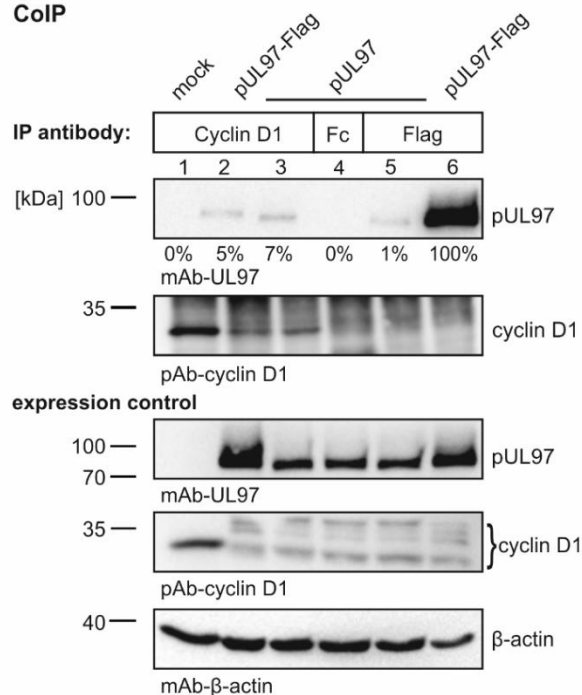

**D**  
CoIP

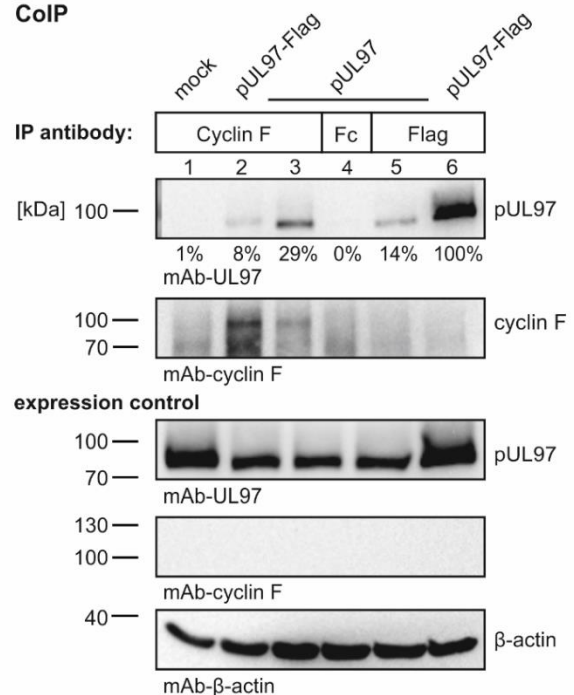

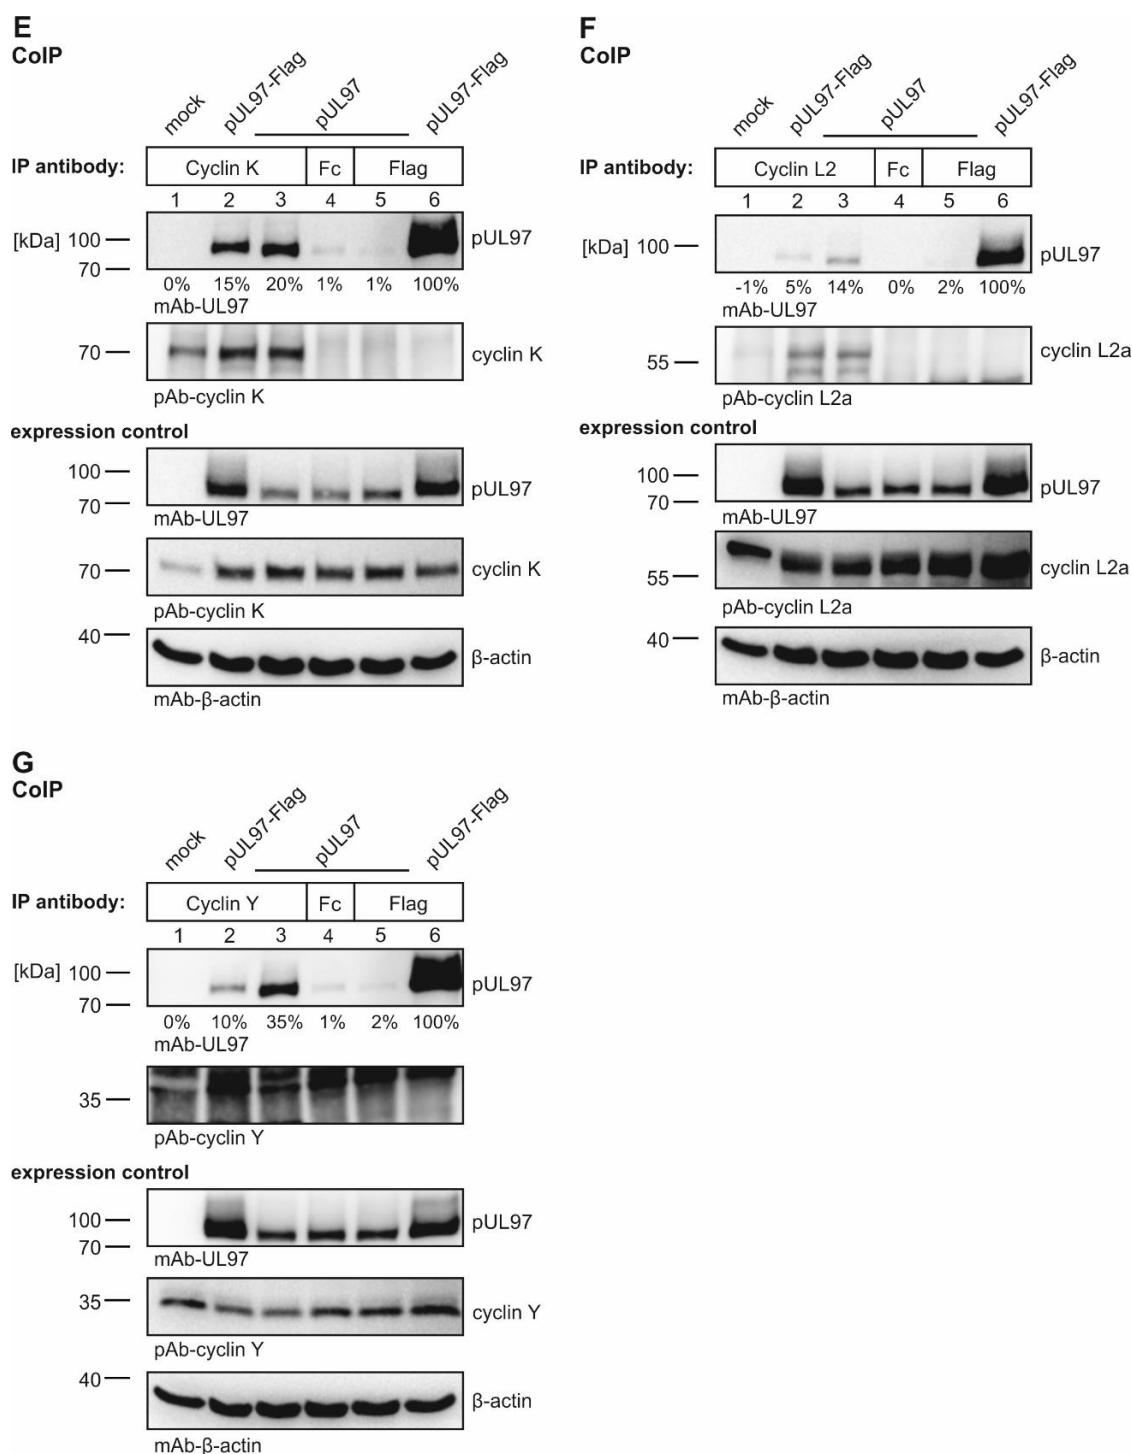

**Figure S1.** Representative series of primary data of the ColP/Wb analysis of pUL97-cyclin interactions (see Table S3 for densitometrical quantitation and Table 2 presenting summarized data of various determinations of pUL97-cyclin interaction). HFFs were infected with HCMV strain AD169 (expressing untagged pUL97) or the recombinant virus AD169-UL97(Mx4)-Flag (expressing the large isoform M1 of pUL97 C-terminally tagged with Flag). ColPs were performed with a specificity of the individually used IP antibodies as indicated, **(A)** cyclin B1, **(B)** cyclin B2, **(C)** cyclin D1, **(D)** cyclin F, **(E)** cyclin K, **(F)** cyclin L2a and **(G)** cyclin Y. Fc, antibody Fc fragment used as a negative control.
